# Supplementary material for: A Specific Diplotype H1j/H2 of the MAPT Gene Could Be Responsible for Parkinson’s Disease with Dementia
Source: Hindawi journal article supplement (doi:10.1155/2020/8813344), 2020-12-03
Supplement: f1 [file 8813344.f1.zip]

Variants of the H1J/H1J diplotype

| Locus          | Genotype | Ref | Observe | Type  | Genes | Length | % Frequer | Exon | Transcript                | Coding | Amino Acid Char |
|----------------|----------|-----|---------|-------|-------|--------|-----------|------|---------------------------|--------|-----------------|
| chr17:44061025 | T/T      | C   | T       | SNV   | MAPT  | 1      | 99.77     | 6    | NM_001123(c.855C>T        |        | p.(=)           |
| chr17:44067382 | C/C      | T   | C       | SNV   | MAPT  | 1      | 100.00    | 8    | NM_001123(c.1321T>C       |        | p.Tyr441His     |
| chr17:44104612 | TG/TG    | T   | TG      | INDEL | MAPT  | 1      | 100.00    | 15   | NM_001123(c.5406_5407insC |        | p.?             |
| chr17:44105395 | G/G      | A   | G       | SNV   | MAPT  | 1      | 99.98     | 15   | NM_001123(c.6189A>G       |        | p.?             |

| Variant Effect | dbSNP          | ClinVar | Coverage | MAF         |
|----------------|----------------|---------|----------|-------------|
| synonymous     | rs63750222     | Benign  | 3998     | 0.11        |
| missense       | rs2258689      | Benign  | 1676     | 0.313       |
| unknown        | rs151340107,rs | Benign  | 3972     | 0.205       |
| unknown        | rs7521         | Benign  | 3996     | 0.386 (ref) |
