# Supplementary material for: A Specific Diplotype H1j/H2 of the MAPT Gene Could Be Responsible for Parkinson’s Disease with Dementia
Source: Hindawi journal article supplement (doi:10.1155/2020/8813344), 2020-12-03
Supplement: f1 [file 8813344.f1.zip]

## List of genes of the NGS panel used

| Gene           | Disease                                          | Location | Transmi | OMIM                                                                      |
|----------------|--------------------------------------------------|----------|---------|---------------------------------------------------------------------------|
| <b>SNCA</b>    | Parkinson disease 1, 4; Dementia, Lewy body      | 4q22.1   | AD      | <a href="https://omim.org/entry/163890">https://omim.org/entry/163890</a> |
| <b>LRRK2</b>   | Parkinson disease 8                              | 12q12    | AD      | <a href="https://omim.org/entry/609007">https://omim.org/entry/609007</a> |
| <b>VPS35</b>   | Parkinson disease 17                             | 16q11.2  | AD      | <a href="https://omim.org/entry/601501">https://omim.org/entry/601501</a> |
| <b>PARK2</b>   | Parkinson disease 2                              | 6q26     | AR      | <a href="https://omim.org/entry/600116">https://omim.org/entry/600116</a> |
| <b>PARK7</b>   | Parkinson disease 7                              | 1p36.23  | AR      | <a href="https://omim.org/entry/602533">https://omim.org/entry/602533</a> |
| <b>PINK1</b>   | Parkinson disease 6                              | 1p36.12  | AR      | <a href="https://omim.org/entry/608309">https://omim.org/entry/608309</a> |
| <b>PLA2G6</b>  | Parkinson disease 14                             | 22q13.1  | AR      | <a href="https://omim.org/entry/603604">https://omim.org/entry/603604</a> |
| <b>VPS13C</b>  | Parkinson disease 23                             | 15q22.2  | AR      | <a href="https://omim.org/entry/608879">https://omim.org/entry/608879</a> |
| <b>SYNJ1</b>   | Parkinson disease 20                             | 21q22.11 | AR      | <a href="https://omim.org/entry/604297">https://omim.org/entry/604297</a> |
| <b>ATP13A2</b> | Kufor-Rakeb syndrome                             | 1p36.13  | AR      | <a href="https://omim.org/entry/610513">https://omim.org/entry/610513</a> |
| <b>DNAJC6</b>  | Parkinson disease 19                             | 1p31.3   | AR      | <a href="https://omim.org/entry/608375">https://omim.org/entry/608375</a> |
| <b>FBXO7</b>   | Parkinson disease 15                             | 22q12.3  | AR      | <a href="https://omim.org/entry/605648">https://omim.org/entry/605648</a> |
| <b>GCH1</b>    | Dystonia, DOPA-responsive                        | 14q22.2  | AD, AR  | <a href="https://omim.org/entry/600225">https://omim.org/entry/600225</a> |
| <b>GBA</b>     | Gaucher disease                                  | 1q22     | AR      | <a href="https://omim.org/entry/606463">https://omim.org/entry/606463</a> |
| <b>POLG</b>    | Mitochondrial DNA depletion syndrome             | 15q26.1  | AR      | <a href="https://omim.org/entry/174763">https://omim.org/entry/174763</a> |
| <b>ATP6AP2</b> | Parkinsonism with spasticity                     | Xp11.4   | XLR     | <a href="https://omim.org/entry/300556">https://omim.org/entry/300556</a> |
| <b>PANK2</b>   | Neurodegeneration with brain iron accumulation 1 | 20p13    | AR      | <a href="https://omim.org/entry/606157">https://omim.org/entry/606157</a> |
| <b>MAPT</b>    | Parkinson disease, susceptibility to             | 17q21.31 | AD      | <a href="https://omim.org/entry/157140">https://omim.org/entry/157140</a> |
| <b>EIF4G1</b>  | Parkinson disease, susceptibility to             | 3q27.1   | AD      | <a href="https://omim.org/entry/600495">https://omim.org/entry/600495</a> |
| <b>UCHL1</b>   | Parkinson disease, susceptibility to             | 4p.13    | AD      | <a href="https://omim.org/entry/191342">https://omim.org/entry/191342</a> |
| <b>GIGYF2</b>  | Parkinson disease, susceptibility to             | 2q37.1   | AD      | <a href="https://omim.org/entry/612003">https://omim.org/entry/612003</a> |
| <b>DNAJC13</b> | Parkinson disease, susceptibility to             | 3q22.1   | AD      | <a href="https://omim.org/entry/614334">https://omim.org/entry/614334</a> |
| <b>HTRA2</b>   | Parkinson disease, susceptibility to             | p13.1    | AD      | <a href="https://omim.org/entry/606441">https://omim.org/entry/606441</a> |
| <b>GAK</b>     | Parkinson disease, susceptibility to             | 4p16.3   | ?       | <a href="https://omim.org/entry/602052">https://omim.org/entry/602052</a> |
| <b>RAB7L1</b>  | Parkinson disease, susceptibility to             | 1q32.1   | ?       | <a href="https://omim.org/entry/603949">https://omim.org/entry/603949</a> |
