# Supplementary material for: A Specific Diplotype H1j/H2 of the MAPT Gene Could Be Responsible for Parkinson’s Disease with Dementia
Source: Hindawi journal article supplement (doi:10.1155/2020/8813344), 2020-12-03
Supplement: f1 [file 8813344.f1.zip]

## Variants of the MAPT H2/H2 diplotype

| Locus          | Genotype | Ref  | Observed | Type  | Genes | % Frequency | Exon |
|----------------|----------|------|----------|-------|-------|-------------|------|
| chr17:44039691 | G/G      | A    | G        | SNV   | MAPT  | 100.00      | 2    |
| chr17:44060775 | T/T      | C    | T        | SNV   | MAPT  | 99.55       | 6    |
| chr17:44061023 | A/A      | G    | A        | SNV   | MAPT  | 99.87       | 6    |
| chr17:44061036 | C/C      | T    | C        | SNV   | MAPT  | 99.82       | 6    |
| chr17:44061278 | T/T      | C    | T        | SNV   | MAPT  | 95.28       | 6    |
| chr17:44067400 | C/C      | T    | C        | SNV   | MAPT  | 93.39       | 8    |
| chr17:44068924 | A/A      | G    | A        | SNV   | MAPT  | 99.93       | 9    |
| chr17:44071294 | C/C      | T    | C        | SNV   | MAPT  | 100.00      | 10   |
| chr17:44073889 | G/G      | A    | G        | SNV   | MAPT  | 99.92       | 11   |
| chr17:44073973 | C/C      | T    | C        | SNV   | MAPT  | 100.00      | 11   |
| chr17:44101563 | C/C      | T    | C        | SNV   | MAPT  | 99.87       | 15   |
| chr17:44101871 | G/G      | A    | G        | SNV   | MAPT  | 100.00      | 15   |
| chr17:44102443 | CCT/CCT  | C    | CCT      | INDEL | MAPT  | 98.56       | 15   |
| chr17:44102604 | C/C      | T    | C        | SNV   | MAPT  | 99.83       | 15   |
| chr17:44102638 | G/G      | A    | G        | SNV   | MAPT  | 99.97       | 15   |
| chr17:44102682 | CT/CT    | C    | CT,T     | INDEL | MAPT  | 99.35, T=0  | 15   |
| chr17:44102689 | C/C      | G    | C        | SNV   | MAPT  | 100.00      | 15   |
| chr17:44102741 | T/T      | TCA  | T        | INDEL | MAPT  | 100.00      | 15   |
| chr17:44102865 | C/C      | A    | C        | SNV   | MAPT  | 99.52       | 15   |
| chr17:44102933 | C/C      | T    | C        | SNV   | MAPT  | 100.00      | 15   |
| chr17:44103296 | C/C      | T    | C        | SNV   | MAPT  | 97.51       | 15   |
| chr17:44103616 | T/T      | C    | T        | SNV   | MAPT  | 99.85       | 15   |
| chr17:44103825 | CA/CA    | TG   | CA       | MNV   | MAPT  | 99.97       | 15   |
| chr17:44104278 | T/T      | TG   | T        | INDEL | MAPT  | 100.00      | 15   |
| chr17:44104343 | C/C      | A    | C        | SNV   | MAPT  | 99.85       | 15   |
| chr17:44104411 | C/C      | CTCC | C        | INDEL | MAPT  | 100.00      | 15   |
| chr17:44104509 | C/C      | T    | C        | SNV   | MAPT  | 99.97       | 15   |
| chr17:44104576 | C/C      | CCTT | C        | INDEL | MAPT  | 99.95       | 15   |
| chr17:44105395 | G/G      | A    | G        | SNV   | MAPT  | 99.90       | 15   |

| Coding                | Amino Acid Change | Variant Effect | dbSNP                   | ClinVar | Coverage | MAF       |
|-----------------------|-------------------|----------------|-------------------------|---------|----------|-----------|
| c.-13A>G              | p.?               | unknown        | rs17650901              | Benign  | 254      | 0.086     |
| c.605C>T              | p.Pro202Leu       | missense       | rs63750417              | Benign  | 3996     | 0.088     |
| c.853G>A              | p.Asp285Asn       | missense       | rs62063786              | Benign  | 3996     | 0.088     |
| c.866T>C              | p.Val289Ala       | missense       | rs62063787              | Benign  | 3965     | 0.088     |
| c.1108C>T             | p.Arg370Trp       | missense       | rs17651549              | Benign  | 1018     | 0.086     |
| c.1339T>C             | p.Ser447Pro       | missense       | rs10445337              | Benign  | 2223     | 0.088     |
| c.1479G>A             | p.(=)             | synonymous     | rs1052551               | Benign  | 1340     | 0.086     |
| c.1512T>C             | p.(=)             | synonymous     | rs62063845              | Benign  | 3993     | 0.088     |
| c.1686A>G             | p.(=)             | synonymous     | rs1052553               | Benign  | 3993     | 0.088     |
| c.1770T>C             | p.(=)             | synonymous     | rs17652121              | Benign  | 3999     | 0.088     |
| c.2357T>C             | p.?               | unknown        | rs9468                  | Benign  | 3971     | 0.086     |
| c.2665A>G             | p.?               | unknown        | rs8712                  | Benign  | 1259     | 0.086     |
| c.3237_3238insCT      | p.?               | unknown        | rs113598111,rs113598112 | Benign  | 139      | 0.086     |
| c.3398T>C             | p.?               | unknown        | rs1052587               | Benign  | 2888     | 0.086     |
| c.3432A>G             | p.?               | unknown        | rs1052590               | Benign  | 3983     | 0.086     |
| c.3476_3477insT       | p.?               | unknown        | rs5820605               | Benign  | 3989     | 0.382     |
| c.3483G>C             | p.?               | unknown        | rs1052594               | Benign  | 3994     | 0.086     |
| c.3536_3537delCA      | p.?               | unknown        |                         | Benign  | 3978     |           |
| c.3659A>C             | p.?               | unknown        | rs17574040              | Benign  | 3993     | 0.086     |
| c.3727T>C             | p.?               | unknown        | rs16940799              | Benign  | 3995     | 0.086     |
| c.4090T>C             | p.?               | unknown        | rs7687                  | Benign  | 3818     | 0.086     |
| c.4410C>T             | p.?               | unknown        | rs17652748              | Benign  | 3992     | 0.086     |
| c.4619_4620delTGinsCA | p.?               | unknown        | rs16940806,rs7711705    | VUS     | 3984     | 0.086     |
| c.5073delG            | p.?               | unknown        | rs5820606               | Benign  | 3671     | 0.086     |
| c.5137A>C             | p.?               | unknown        | rs2158257               | Benign  | 3320     | 0.086     |
| c.5206_5208delTCC     | p.?               | unknown        | rs199706121,rs568475466 |         | 2364     | 0.086     |
| c.5303T>C             | p.?               | unknown        | rs17574228              | Benign  | 3985     | 0.086     |
| c.5371_5373delCTT     | p.?               | unknown        | rs760422692             | Benign  | 3972     | 0.174     |
| c.6189A>G             | p.?               | unknown        | rs7521                  | Benign  | 3999     | 0.386 (1) |

0.386 (ref)
