# Supplementary material for: A Specific Diplotype H1j/H2 of the MAPT Gene Could Be Responsible for Parkinson’s Disease with Dementia
Source: Hindawi journal article supplement (doi:10.1155/2020/8813344), 2020-12-03
Supplement: f1 [file 8813344.f1.zip]

## Epidemiological data of Idiopathic PD and individual controls

| Individual ID | Gender | Age | Age at onset | Ethnic origin |
|---------------|--------|-----|--------------|---------------|
| 3159          | F      | 60  | 57           | Arabic        |
| 3214          | F      | 66  | 50           | Arabic        |
| 3216          | F      | 64  | 58           | Berber        |
| 3228          | H      | 70  | 52           | Arabic        |
| 3316          | H      | 58  | 48           | Berber        |
| 3317          | H      | 49  | 44           | Berber        |
| 3334          | H      | 67  | 60           | Arabe         |
| 3348          | F      | 69  | 65           | Arabic        |
| 3370          | H      | 66  | 62           | Arabic        |
| 3435          | H      | 51  | 45           | Arabic        |
| 3507          | H      | 62  | 58           | Arabic        |
| 3508          | H      | 54  | 53           | Mixed         |
| 3533          | H      | 37  | 28           | Mixed         |
| 3536          | F      | 46  | 42           | Arabic        |
| 3537          | F      | 62  | 52           | Berber        |
| 3573          | H      | 62  | 52           | Berber        |
| 3588          | F      | 62  | 55           | Arabic        |
| 3592          | H      | 43  | 41           | Berber        |
| 3593          | H      | 80  | 73           | Berber        |
| 3600          | H      | 69  | 64           | Arabic        |
| 3623          | H      | 57  | 34           | Arabic        |
| 3626          | F      | 62  | 60           | Arabic        |
| 3632          | F      | 61  | 59           | Mixed         |
| 3650          | F      | 68  | 62           | Mixed         |
| 3666          | H      | 62  | 61           | Arabic        |
| 3671          | H      | 80  | 64           | Berber        |
| 3695          | F      | 55  | 53           | Arabic        |
| 3710          | H      | 47  | 44           | Arabic        |
| 3711          | H      | 53  | 47           | Arabic        |
| 3754          | F      | 65  | 60           | Arabic        |
| 3761          | H      | 51  | 49           | Arabic        |
| 3779          | F      | 60  | 50           | Mixed         |
| 3786          | H      | 64  | 62           | Arabic        |
| 3793          | H      | 48  | 46           | Arabic        |
| 3794          | H      | 60  | 54           | Berber        |
| 3797          | F      | 65  | 60           | Berber        |
| 3798          | H      | 66  | 53           | Arabic        |
| 3801          | F      | 60  | 59           | Arabic        |
| 3802          | F      | 75  | 70           | Arabic        |
| 3808          | F      | 75  | 55           | Arabic        |
| 3812          | H      | 57  | 45           | Arabic        |
| 3814          | H      | 68  | 60           | Arabic        |
| 3815          | H      | 70  | 66           | Arabic        |
| 3818          | F      | 45  | 37           | Mixed         |
| 3821          | H      | 49  | 44           | Arabic        |
| 3822          | H      | 65  | 55           | Arabic        |
| 3824          | H      | 68  | 64           | Arabic        |
| 3847          | H      | 71  | 69           | Berber        |
| 3851          | H      | 45  | 37           | Berber        |

|      |   |    |    |        |
|------|---|----|----|--------|
| 3852 | F | 80 | 76 | Arabic |
| 3853 | H | 63 | 57 | Arabic |
| 3854 | F | 54 | 49 | Arabic |
| 3855 | H | 30 | 27 | Arabic |
| 3856 | F | 53 | 50 | Arabic |
| 3860 | H | 52 | 40 | Berber |
| 3861 | F | 58 | 46 | Berber |
| 3864 | H | 67 | 65 | Arabic |
| 3870 | H | 64 | 48 | Arabic |
| 3871 | H | 66 | 45 | Mixed  |
| 3876 | H | 58 | 54 | Arabic |
| 3877 | H | 65 | 64 | Arabic |
| 3880 | H | 63 | 63 | Arabic |
| 3890 | F | 53 | 46 | Arabic |
| 3892 | F | 57 | 35 | Arabic |
| 3893 | M | 70 | 68 | Mixed  |
| 3894 | F | 59 | 57 | Berber |
| 3895 | F | 49 | 47 | Arabic |
| 3898 | M | 53 | 51 | Berber |
| 3900 | M | 76 | 60 | Arabe  |
| 3901 | M | 43 | 37 | Berber |
| 3902 | M | 63 | 52 | Arabic |
| 3907 | H | 44 | 38 | Arabic |
| 3908 | H | 62 | 58 | Arabic |
| 3909 | F | 62 | 60 | Arabic |
| 3913 | H | 60 | 60 | Berber |
| 3928 | H | 35 | 31 | Arabic |
| 3931 | F | 55 | 42 | Arabic |
| 3941 | F | 54 | 49 | Arabic |
| 3947 | H | 76 | 72 | Arabic |
| 3957 | F | 65 | 65 | Arabic |
| C002 | F | 37 |    | Arabic |
| C007 | M | 25 |    | Arabic |
| C008 | F | 24 |    | Berber |
| C009 | M | 52 |    | Arabic |
| C010 | M | 52 |    | Arabic |
| C011 | M | 27 |    | Arabic |
| C012 | M | 28 |    | Berber |
| C013 | M | 43 |    | Berber |
| C016 | H | 30 |    | Mixed  |
| C017 | F | 31 |    | Arabic |
| C018 | M | 26 |    | Arabic |
| C019 | M | 34 |    | Arabic |
| C020 | M | 33 |    | Berber |
| C021 | M | 24 |    | Berber |
| C025 | M | 43 |    | Arabic |
| C030 | M | 39 |    | Arabic |
| C032 | M | 36 |    | Arabic |
| C034 | M | 24 |    | Arabic |
| C037 | M | 31 |    | Arabic |
| C038 | M | 36 |    | Mixed  |
| C039 | M | 54 |    | Mixed  |

|      |   |    |  |        |
|------|---|----|--|--------|
| C041 | M | 37 |  | Mixed  |
| C044 | M | 32 |  | Berber |
| C045 | M | 39 |  | Mixed  |
| C046 | M | 33 |  | Arabic |
| C047 | F | 40 |  | Arabic |
| C049 | F | 34 |  | Mixed  |
| C050 | F | 35 |  | Arabic |
| C052 | F | 37 |  | Berber |
| C054 | F | 28 |  | Arabic |
| C055 | M | 29 |  | Berber |
| C057 | M | 43 |  | Arabic |
| C058 | M | 25 |  | Arabic |
| C060 | M | 47 |  | Arabic |
| C061 | M | 29 |  | Arabic |
| C062 | F | 41 |  | Arabic |
| C066 | M | 40 |  | Berber |
| C067 | M | 28 |  | Arabic |
| C068 | M | 26 |  | Arabic |
| C069 | M | 36 |  | Arabic |
| C070 | F | 45 |  | Berber |
| C071 | F | 40 |  | Arabic |
| C072 | F | 20 |  | Mixed  |
| C073 | F | 21 |  | Arabic |
| C075 | F | 22 |  | Arabic |
| C076 | M | 37 |  | Mixed  |
| C077 | M | 51 |  | Berber |
| C079 | M | 58 |  | Arabic |
| C080 | F | 47 |  | Mixed  |
| C082 | M | 57 |  | Mixed  |
| C083 | F | 24 |  | Berber |
| C084 | M | 35 |  | Arabic |
| C085 | M | 54 |  | Arabic |
| C086 | M | 41 |  | Berber |
| C088 | F | 20 |  | Arabic |
| C090 | F | 31 |  | Arabic |
| C091 | M | 28 |  | Berber |
| C094 | F | 43 |  | Arabic |
| C095 | F | 31 |  | Arabic |
| C096 | F | 58 |  | Arabic |
| C097 | M | 36 |  | Arabic |
| C098 | F | 20 |  | Arabic |
| C099 | F | 30 |  | Mixed  |
| C100 | F | 59 |  | Berber |
| C101 | F | 46 |  | Arabic |
| C102 | F | 43 |  | Arabic |
| C103 | F | 26 |  | Berber |
| C104 | F | 56 |  | Mixed  |
| C106 | M | 46 |  | Arabic |
| C108 | M | 50 |  | Berber |
| C110 | F | 21 |  | Arabic |
| C111 | M | 32 |  | Berber |
| C113 | F | 41 |  | Berber |

|      |   |    |  |        |
|------|---|----|--|--------|
| C117 | M | 59 |  | Arabic |
| C118 | M | 36 |  | Berber |
| C121 | F | 44 |  | Berber |
| C122 | F | 23 |  | Arabic |
| C123 | F | 44 |  | Berber |
| C124 | F | 44 |  | Arabic |
| C130 | M | 33 |  | Berber |
| C137 | M | 44 |  | Berber |
| C160 | M | 34 |  | Mixed  |
| C163 | F | 44 |  | Arabic |
| C164 | F | 33 |  | Mixed  |
| C165 | M | 33 |  | Arabic |
| C171 | M | 60 |  | Arabic |
| C177 | M | 39 |  | Mixed  |
| C180 | M | 54 |  | Berber |
| C193 | F | 23 |  | Mixed  |
| C196 | M | 60 |  | Arabic |
| C198 | F | 60 |  | Mixed  |
| C201 | M | 56 |  | Arabic |
