# Supplementary material for: A Specific Diplotype H1j/H2 of the MAPT Gene Could Be Responsible for Parkinson's Disease with Dementia
Source: Case Rep Genet. 2020 Dec 3;2020:8813344. doi: 10.1155/2020/8813344 (PMC7732378; doi:10.1155/2020/8813344)
Supplement: Supplementary Materials — The Supplementary Material contains the NGS gene panel, all the mutations identified in the Moroccan MAPT H2 haplotype and H1j haplotype, and the epidemiological data of Idiopathic PD and control individuals. [file 8813344.f1.zip]

Archive with 4 entries (4 files):
- 8813344.f1/Supplementary Material 02.pdf
- 8813344.f1/Supplementary Material 03.pdf
- 8813344.f1/Supplementary Material 04.pdf
- 8813344.f1/Supplementary Material O1.pdf
